# Supplementary material
Source: publisher figshare collection journal article supplement (https://acs.figshare.com/ndownloader/files/5717712)
Supplement: Supplementary file 1 [file 5717712]

# ja001064c.cif

CIF file of N,N-Dimethyl-2-benzoylbenzamide 3a

____________________________________________________________________________
Preprint generated via IUCr CIF-to-MS convertor version 0.9b
at 14:05 25 Dec 1998
Copyright (c) 1992 International Union of Crystallography
____________________________________________________________________________

Acta Cryst. (199n). CNN, 000--000
Crystal and molecular structure of N,N-dimethyl-2-benzoylbenzamide 3a

(Received  00  XXXX  1992; accepted  00 XXXX  1992)

Abstract.
 We present the crystal and molecular structure of N,N-dimethyl-2-benzoylben
zamide.

Comment.
 (JA001064C-29-66) The study of the titled structure was undertaken to estab
lish its three
dimensional structure. Geometries are tabulated below. All Diagrams and
calculations were performed using maXus (MacScience, Japan).


----------------------------------------------------------------------------

Experimental

Compound <datablock>

Crystal data


  C~16~H~15~O~2~N
  M~r~ =  253.00
  Orthorhombic
  P2~1~2~1~2~1~
  a =  10.420 (2) <Angstrom>
  b =  17.208 (4) <Angstrom>
  c =  7.519 (2) <Angstrom>
  <alpha> =  90.000000 (0) <degree>
  <beta>  =  90.000000 (0) <degree>
  <gamma> =  90.000000 (0) <degree>
  V =  1348.3 (6) <Angstrom>^3^
  Z =  4
  D~x~ =  1.246  Mg m^-3^
  D~m~ =  1.246  Mg m^-3^
  Cu K<alpha>
  <lambda> =  1.5418  <Angstrom>
  Cell parameters from  22  reflections
  <2theta> =  1 --   140  <degree>
  <mu> =  6.614  cm^-1^
  T =   298  K
  Cube
  0.4    x  0.3      x  0.3  mm
  Colourless
  Local laboratory

----------------------------------------------------------------------------

Data collection


  Mac Science MXC18
  theta/2theta
  Absorption correction:  none
  1561  measured reflections
  1279  independent reflections
  1156  observed reflections
  Criterion:  refl observed if I > 3.00 sigma(I)
  <theta>~max~ =  53.80  <degree>
  h =  0   -> 12
  k =  -20   -> 0
  l =  0   -> 9

----------------------------------------------------------------------------

Refinement


  Refinement on  F
  Final R =   0.032
  wR =  0.035
  S =  1.610
  1156  reflections
  232  parameters
  Only H-atom coordinates refined
  w =  Count statistics
  <Delta>/<sigma>~max~ = 0.6447
  <Delta><rho>~max~ =  0.16
  <Delta><rho>~min~ =  -0.14
  Extinction correction:  None
>Atomic scattering factors from  D. Waasmaier&A. Kirfel,Acta Cryst.1995,A51,
>416-431

  Data collection:  MXC(MAC Science)
  Cell refinement:  MXC(MAC Science)
  Data reduction:  maXus
  Program(s) used to solve structure:  maXus
  Program(s) used to refine structure:  maXus
  Molecular graphics:  maXus
  Software used to prepare material for publication:  maXus

-------------------------- Table of coordinates ----------------------------
Table <tableno>.  Fractional atomic coordinates and equivalent isotropic
thermal parameters (<Angstrom>^2^) for <datablock>

U~eq~ = 1/3<Sum>~i~<Sum>~j~ U~ij~a~i~*a~j~* a~i~.a~j~.


                x               y               z               U~eq~
 O1       1.06004 (5)   0.04895 (4)       0.33549 (7)     0.0663 (3)
 N2       1.08876 (5)   0.07443 (4)       0.62752 (7)     0.0486 (3)
 O3       0.99540 (6)   0.22831 (3)       0.40108 (8)     0.0651 (3)
 C4       0.81742 (5)   0.14497 (3)       0.40176 (8)     0.0364 (2)
 C5       0.90082 (6)   0.20656 (3)       0.32075 (8)     0.0405 (3)
 C6       0.68413 (5)   0.15204 (4)       0.40143 (9)     0.0419 (3)
 C7       0.87419 (5)   0.08361 (3)       0.49494 (8)     0.0379 (2)
 C8       0.66454 (7)   0.03753 (4)       0.58051 (9)     0.0521 (3)
 C9       0.86575 (5)   0.24113 (3)       0.14446 (8)     0.0411 (2)
 C10      0.78462 (6)   0.20421 (4)       0.02455 (9)     0.0487 (3)
 C11      0.60855 (6)   0.09829 (4)       0.48998 (9)     0.0481 (3)
 C12      0.79782 (6)   0.03001 (4)       0.58378 (9)     0.0478 (3)
 C13      0.91942 (7)   0.31311 (4)       0.1002 (1)      0.0516 (3)
 C14      0.75630 (8)   0.23869 (6)      -0.13744 (9)     0.0640 (4)
 C15      1.01726 (5)   0.06928 (4)       0.47988 (8)     0.0426 (3)
 C16      1.22557 (7)   0.05823 (6)       0.6137 (1)      0.0649 (4)
 C17      1.04588 (9)   0.11260 (7)       0.7909 (1)      0.0654 (4)
 C18      0.8082 (1)   0.30982 (7)       -0.1798 (1)      0.0758 (5)
 C19      0.8900 (1)   0.34748 (5)       -0.0612 (1)      0.0711 (5)
 H12      0.8408 (8)  -0.0143 (5)         0.658 (1)       0.026 (2)
 H13      0.9835 (9)   0.3350 (5)         0.194 (1)       0.032 (2)
 H17A     0.959 (1)   0.1208 (8)          0.791 (2)       0.070 (4)
 H19      0.933 (1)   0.3985 (6)         -0.088 (2)       0.051 (3)
 H16A     1.250 (2)   0.0272 (8)          0.718 (2)       0.081 (4)
 H14      0.703 (1)   0.2117 (6)         -0.222 (2)       0.053 (3)
 H10      0.755 (1)   0.1519 (6)          0.057 (1)       0.040 (2)
 H11      0.516 (1)   0.1032 (6)          0.485 (2)       0.048 (3)
 H8       0.6104 (9)  -0.0010 (5)         0.641 (1)       0.034 (2)
 H16B     1.246 (1)   0.0334 (7)          0.502 (2)       0.057 (3)
 H6       0.6452 (8)   0.1937 (5)         0.340 (1)       0.026 (2)
 H16C     1.277 (2)   0.1095 (9)          0.610 (2)       0.106 (6)
 H18      0.784 (2)   0.3441 (9)         -0.297 (2)       0.106 (6)
 H17B     1.067 (2)   0.079 (1)           0.876 (3)       0.121 (7)
 H17C     1.104 (2)   0.1649 (9)          0.799 (2)       0.100 (6)


#===END

CIF file of N-methyl-2-benzoylbenzanilide 3b

____________________________________________________________________________
Preprint generated via IUCr CIF-to-MS convertor version 0.9b
at 14:43 13 Oct 1998
Copyright (c) 1992 International Union of Crystallography
____________________________________________________________________________


Acta Cryst. (199n). CNN, 000--000


Crystal and molecular structure of MePhamide

Masami Sakamoto

Department of Materials Technology,
Faculty of Engineering,
Chiba University

(Received  00  XXXX  1992; accepted  00 XXXX  1992)

Abstract.
 We present the crystal and molecular structure of
MePhamide.

Comment.
 (JA001064C-29-66) The study of the titled structure was undertaken to estab
lish its three
dimensional structure. Geometries are tabulated below. All Diagrams and
calculations were performed using maXus (MacScience, Japan).


----------------------------------------------------------------------------

Experimental

Compound <datablock>

Crystal data


  C~21~H~17~O~2~N
  M~r~ =  315.00
  Orthorhombic
  P2~1~2~1~2~1~
  a =  11.453 (3) <Angstrom>
  b =  18.572 (5) <Angstrom>
  c =  8.107 (2) <Angstrom>
  <alpha> =  90.000000 (0) <degree>
  <beta>  =  90.000000 (0) <degree>
  <gamma> =  90.000000 (0) <degree>
  V =  1724.5 (8) <Angstrom>^3^
  Z =  4
  D~x~ =  1.213  Mg m^-3^
  D~m~ =  1.213  Mg m^-3^
  Cu K<alpha>
  <lambda> =  1.5418  <Angstrom>
  Cell parameters from  22  reflections
  <2theta> =  1 --   140  <degree>
  <mu> =  6.217  cm^-1^
  T =   298  K
  Cube
  0.3    x  0.1      x  0.1  mm
  Colourless
  Local laboratory

----------------------------------------------------------------------------

Data collection


  Mac Science MXC18
  theta/2theta
  Absorption correction:  none
  1967  measured reflections
  1628  independent reflections
  837  observed reflections
  Criterion:  refl observed if I > 3.00 sigma(I)
  <theta>~max~ =  53.89  <degree>
  h =  0   -> 13
  k =  0   -> 22
  l =  0   -> 9

----------------------------------------------------------------------------

Refinement


  Refinement on  F
  Final R =   0.044
  wR =  0.044
  S =  1.839
  837  reflections
  217  parameters
  Only H-atom coordinates refined
  w =  Count statistics
  <Delta>/<sigma>~max~ = 0.1692
  <Delta><rho>~max~ =  0.12
  <Delta><rho>~min~ =  -0.16
  Extinction correction:  None
>Atomic scattering factors from  D. Waasmaier&A. Kirfel,Acta Cryst.1995,A51,
>416-431

  Data collection:  MXC(MAC Science)
  Cell refinement:  MXC(MAC Science)
  Data reduction:  maXus
  Program(s) used to solve structure:  maXus
  Program(s) used to refine structure:  maXus
  Molecular graphics:  maXus
  Software used to prepare material for publication:  maXus

-------------------------- Table of coordinates ----------------------------
Table <tableno>.  Fractional atomic coordinates and equivalent isotropic
thermal parameters (<Angstrom>^2^) for <datablock>

U~eq~ = 1/3<Sum>~i~<Sum>~j~ U~ij~a~i~*a~j~* a~i~.a~j~.


                x               y               z               U~eq~
 O1       0.0435 (2)   0.1342 (1)         0.8329 (3)      0.068 (1)
 O2       0.1775 (2)   0.1767 (1)         1.1415 (3)      0.061 (1)
 N3       0.2674 (2)   0.2405 (1)         0.9407 (3)      0.050 (1)
 C4       0.2014 (3)   0.0560 (2)         0.8814 (4)      0.045 (2)
 C5       0.2343 (3)   0.1782 (2)         1.0137 (4)      0.050 (2)
 C6       0.3183 (3)   0.2452 (2)         0.7785 (4)      0.047 (2)
 C7       0.3968 (3)   0.0948 (2)         0.9522 (5)      0.058 (2)
 C8       0.2784 (3)   0.1096 (2)         0.9391 (4)      0.045 (2)
 C9       0.4237 (3)   0.2802 (2)         0.7597 (5)      0.053 (2)
 C10      0.0749 (3)   0.0728 (2)         0.8595 (4)      0.051 (2)
 C11     -0.0155 (3)   0.0155 (2)         0.8729 (4)      0.054 (2)
 C12      0.2485 (4)  -0.0112 (2)         0.8351 (4)      0.061 (2)
 C13      0.2608 (3)   0.2163 (2)         0.6447 (4)      0.055 (2)
 C14      0.3091 (3)   0.2234 (2)         0.4888 (4)      0.066 (2)
 C15      0.4694 (3)   0.2875 (2)         0.6040 (5)      0.066 (2)
 C16     -0.1190 (3)   0.0249 (2)         0.7857 (5)      0.067 (2)
 C17      0.4403 (3)   0.0279 (2)         0.9064 (5)      0.069 (2)
 C18     -0.0016 (4)  -0.0448 (2)         0.9721 (5)      0.071 (2)
 C19      0.4153 (3)   0.2593 (2)         0.4672 (5)      0.064 (2)
 C20      0.3673 (3)  -0.0235 (2)         0.8455 (6)      0.072 (2)
 C21      0.2383 (4)   0.3083 (2)         1.0223 (5)      0.077 (2)
 C22     -0.1961 (4)  -0.0841 (3)         0.8974 (7)      0.097 (3)
 C23     -0.0948 (4)  -0.0943 (2)         0.9871 (6)      0.088 (3)
 C24     -0.2078 (3)  -0.0249 (2)         0.7959 (6)      0.083 (3)
 H7       0.449 (4)   0.131 (2)           0.994 (5)       0.05 (5)
 H9       0.465 (4)   0.299 (2)           0.853 (5)       0.05 (5)
 H12      0.19703  -0.04842       0.79681         0.05000
 H13      0.18787   0.19141       0.65803         0.05000
 H14      0.26860   0.20334       0.39589         0.05000
 H15      0.54170   0.31323       0.59317         0.05000
 H16     -0.12800   0.06663       0.71703         0.05000
 H17      0.52235   0.01878       0.91727         0.05000
 H18      0.06960  -0.05426       1.03083         0.05000
 H19      0.45093   0.26458       0.36068         0.05000
 H20      0.39912  -0.06880       0.81033         0.05000
 H21A     0.20532   0.29848       1.12880         0.05000
 H21B     0.18282   0.33438       0.95670         0.05000
 H21C     0.30792   0.33658       1.03510         0.05000
 H22     -0.25854  -0.11853       0.90348         0.05000
 H23     -0.08720  -0.13426       1.06134         0.05000
 H24     -0.27799  -0.01747       0.73340         0.05000


#===END

CIF file of 4,N-dimethyl-2-benzoylbenzanilide 3c

____________________________________________________________________________
Preprint generated via IUCr CIF-to-MS convertor version 0.9b
at 17:53 08 Mar 2000
Copyright (c) 1992 International Union of Crystallography
____________________________________________________________________________


Acta Cryst. (199n). CNN, 000--000


Crystal and molecular structure of 4-methyl--N-methyl-2-benzoylbenzanilide

M. SAKAMOTO

CHIBA UNIV.

(Received  00  XXXX  1992; accepted  00 XXXX  1992)

Abstract.
 We present the crystal and molecular structure of 4-methyl--N-methyl-2-benz
oylbenzanilide.

Comment.
 (JA001064C-29-66) The study of the titled structure was undertaken to estab
lish its three
dimensional structure. Geometries are tabulated below. All Diagrams and
calculations were performed using maXus (MacScience, Japan).


----------------------------------------------------------------------------

Experimental

Compound <datablock>

Crystal data


  C~22~H~19~O~2~N
  M~r~ =  329.00
  Monoclinic
  P2~1~2~1~2~1~
  a =  19.106 (5) <Angstrom>
  b =  8.019 (2) <Angstrom>
  c =  11.986 (3) <Angstrom>
  <alpha> =  90.000000 (0) <degree>
  <beta>  =  90.37 (2) <degree>
  <gamma> =  90.000000 (0) <degree>
  V =  1836.3 (9) <Angstrom>^3^
  Z =  4
  D~x~ =  1.190  Mg m^-3^
  D~m~ =  1.190  Mg m^-3^
  Cu K<alpha>
  <lambda> =  1.5418  <Angstrom>
  Cell parameters from  22  reflections
  <theta> =  1 --   140  <degree>
  <mu> =  6.036  cm^-1^
  T =   298  K
  Cube
  0.3    x  0.2      x  0.2  mm
  Colourless
  Local laboratory

----------------------------------------------------------------------------

Data collection


  Mac Science MXC18
  theta/2theta
  Absorption correction:  none
  4072  measured reflections
  1755  independent reflections
  613  observed reflections
  Criterion:  refl observed if I > 3.00 sigma(I)
  R~int~ =  0.041
  <theta>~max~ =  49.29  <degree>
  h =  -23   -> 23
  k =  0   -> 9
  l =  0   -> 14

----------------------------------------------------------------------------

Refinement


  Refinement on  F
  Final R =   0.044
  wR =  0.045
  S =  1.455
  613  reflections
  253  parameters
  Only H-atom coordinates refined
  w =  Count statistics
  <Delta>/<sigma>~max~ = 0.4535
  <Delta><rho>~max~ =  0.19
  <Delta><rho>~min~ =  -0.13
  Extinction correction:  None
>Atomic scattering factors from  D. Waasmaier&A. Kirfel,Acta Cryst.1995,A51,
>416-431

  Data collection:  MXC(MAC Science)
  Cell refinement:  MXC(MAC Science)
  Data reduction:  maXus
  Program(s) used to solve structure:  maXus
  Program(s) used to refine structure:  maXus
  Molecular graphics:  maXus
  Software used to prepare material for publication:  maXus

-------------------------- Table of coordinates ----------------------------
Table <tableno>.  Fractional atomic coordinates and equivalent isotropic
thermal parameters (<Angstrom>^2^) for <datablock>

U~eq~ = 1/3<Sum>~i~<Sum>~j~ U~ij~a~i~*a~j~* a~i~.a~j~.


                x               y               z               U~eq~
 O1       0.1341 (3)   0.1790 (7)         0.0275 (4)      0.102 (4)
 O2       0.1961 (3)  -0.1295 (7)         0.1330 (5)      0.108 (4)
 N3       0.2525 (4)   0.0743 (6)         0.2265 (4)      0.077 (4)
 C4       0.1275 (4)   0.0417 (8)         0.2497 (6)      0.073 (5)
 C5       0.1938 (5)  -0.0068 (9)         0.1943 (6)      0.081 (5)
 C6       0.2499 (4)   0.2324 (8)         0.2841 (5)      0.067 (4)
 C7       0.0778 (5)   0.1273 (9)         0.0633 (7)      0.080 (5)
 C8       0.0710 (5)   0.0929 (8)         0.1860 (7)      0.073 (5)
 C9       0.2221 (4)   0.3692 (8)         0.2300 (6)      0.080 (5)
 C10      0.2517 (6)   0.536 (1)          0.3884 (7)      0.101 (6)
 C11      0.2776 (4)   0.246 (1)          0.3873 (6)      0.088 (5)
 C12      0.0188 (5)   0.097 (1)         -0.0179 (7)      0.082 (5)
 C13     -0.0335 (5)  -0.010 (1)          0.0027 (8)      0.093 (6)
 C14      0.0633 (6)   0.032 (1)          0.4143 (8)      0.100 (7)
 C15      0.1221 (6)   0.017 (1)          0.3610 (6)      0.095 (6)
 C16      0.0047 (5)   0.0918 (9)         0.3633 (8)      0.094 (6)
 C17      0.0090 (5)   0.120 (1)          0.2433 (9)      0.101 (6)
 C18      0.2783 (5)   0.399 (1)          0.4415 (7)      0.102 (5)
 C19      0.0227 (5)   0.176 (1)         -0.1206 (9)      0.098 (6)
 C20      0.2232 (5)   0.5214 (9)         0.2811 (7)      0.094 (5)
 C21     -0.0623 (6)   0.111 (2)          0.423 (1)       0.126 (8)
 C22     -0.0872 (7)  -0.034 (2)         -0.076 (2)       0.137 (9)
 C23     -0.0826 (8)   0.051 (2)         -0.177 (1)       0.14 (1)
 C24      0.3211 (7)   0.014 (1)          0.190 (1)       0.128 (8)
 C25     -0.0269 (7)   0.157 (2)         -0.197 (1)       0.123 (9)
 H9       0.194 (3)   0.347 (6)           0.156 (5)       0.02 (1)
 H10      0.246 (5)   0.66 (1)    0.424 (6)       0.07 (2)
 H20      0.184 (5)   0.62 (1)    0.258 (8)       0.11 (3)
 H11      0.297 (6)   0.15 (1)    0.42 (1)        0.08 (3)
 H18      0.298 (4)   0.409 (9)           0.515 (6)       0.15 (5)
 H24A     0.363 (5)   0.07 (1)    0.213 (9)       0.21 (9)
 H24B     0.32028   0.01496       0.10974         0.25 (9)
 H24C     0.32538  -0.09954       0.21504         0.24 (9)
 H21A    -0.10300   0.15424       0.38546         0.24 (9)
 H21B    -0.05370   0.18244       0.48536         0.9 (4)
 H21C    -0.07490   0.00204       0.44926         1.0 (9)
 H17     -0.03192   0.15753       0.20344         0.050 (9)
 H15      0.16394  -0.01213       0.40136         0.12 (4)
 H14      0.06061  -0.00188       0.49107         0.11 (4)
 H25     -0.02509   0.21688      -0.26663         0.10 (4)
 H23     -0.11890   0.03624      -0.23143         0.10 (3)
 H22     -0.12593  -0.10658      -0.06037         0.05 (2)
 H13     -0.03434  -0.06994       0.07195         0.05 (2)
 H19      0.06211   0.24641      -0.13635         0.04 (2)

#===END
